# Supplementary material
Source: Springer Nature journal article supplement (https://www.springermedizin.de/resource/supplementary/12943_2004_99_MOESM2_ESM.pdf/9553428)

**CpG position** -393 -374 -365 -350 -339 -324 -318 -311 -309 -301 -280 -246 -231 -229 -226 -222 -212

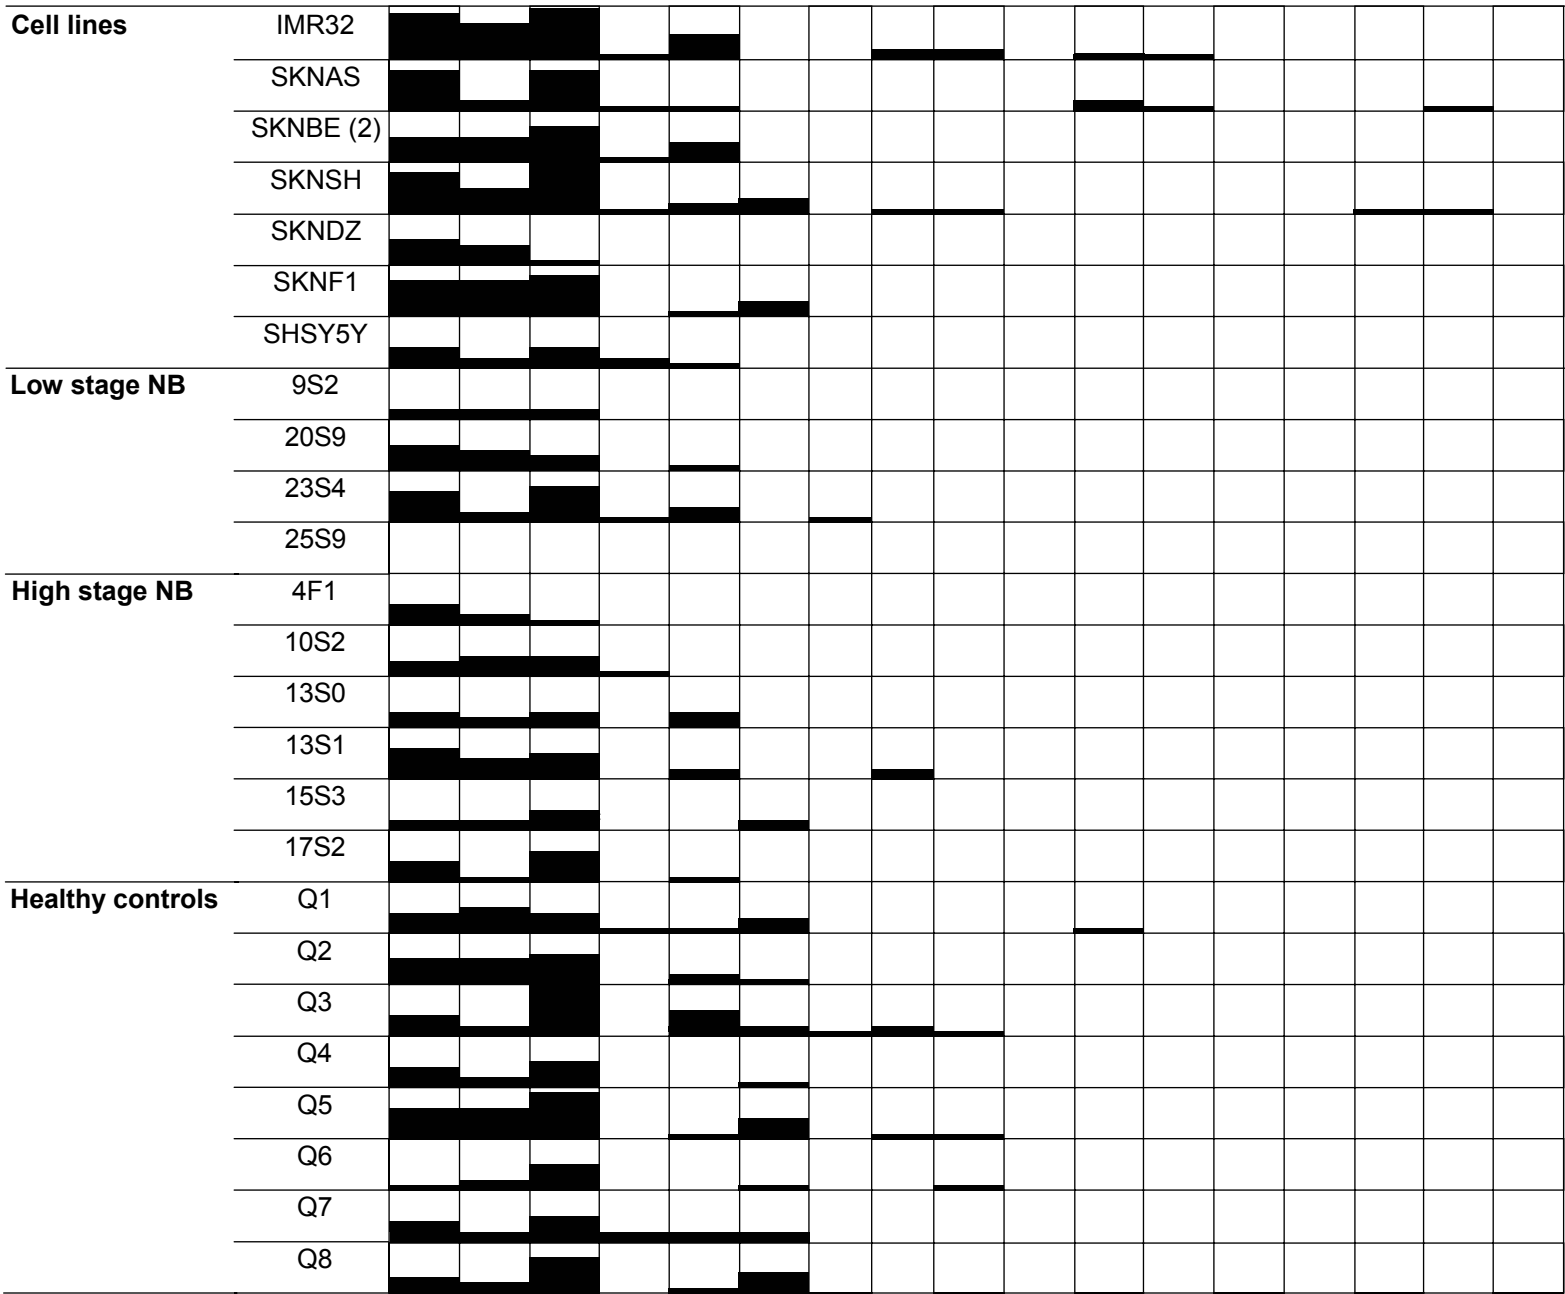

Supplement: MOESM2 [file 9553428]
